# Supplementary material for: A cross-platform metabolomics workflow for volume-restricted tissue samples: application to an animal model for polycystic kidney disease
Source: Royal Society of Chemistry journal article supplement (doi:10.1039/c7mb00245a), 2017-08-02
Supplement: c7mb00245a1.xlsx [file c7mb00245a1.xlsx]

## Sheet: HILIC
Sample	Group	TimeWeeks	M199T60	M250T60	M261T60	M262T60	M264T60	M307T60	M314T60	M439T60	M305T61	M208T63	M257T64	M137T65	M167T65	M138T66	M181T66	M261T66	M262T66	M283T66	M284T66	M463T67	M114T68	M157T68	M158T68	M239T68	M337T68	M321T69	M343T69	M347T69	M355T69	M151T71	M231T71	M107T72	M253T72	M335T72	M141T73	M187T73	M257T73	M217T77	M239T77	M293T77	M321T77	M347T77	M137T78	M153T79	M243T79	M425T80	M135T81
10A	MCK	10	127889	189772	142069	61583.7	134428	128429	106962	169047	114837	310340	2010960	158315	824956	16830.2	65206.8	162202	19498.2	100928	12157.8	22570.7	49906.3	2650010	112915	297254	250615	111132	116021	55834.5	209315	367464	85369.4	47131.8	133661	68581.3	5618050	16973.6	6463480	510237	112321	468454	368727	156986	38762.2	71898.7	281575	252236	9642810
10B	MCK	10	128258	129542	143514	60697.3	140380	107309	62373	187256	88974.1	1709950	2389940	173184	457478	12082.2	97931.5	130673	16760.3	69200.2	10481.3	18176.9	79624.2	2358510	90987.6	475040	205759	130905	119547	81237	175796	409794	128948	64199.8	173335	57484	5224720	22276	4353760	801872	355146	1413400	600980	409182	57080.8	99080.6	300232	507992	12122100
10C	MCK	10	154084	215467	170496	77438.1	150192	135191	133278	194540	106664	180982	2487570	139108	585397	14626.3	86635.5	87459.4	15733.3	97907	12671	18394	55599.7	2719010	107442	515035	217635	112663	131861	94688.6	211488	356743	70609.1	47868.6	120635	72944.9	6199140	14717	5382260	369952	149240	248409	294653	71274.2	31315.2	76735.5	320768	76224.9	5159610
11A	Wt	14	28228	121944	89888.5	35460	71039	81667.1	30956.4	64833.7	327849	151754	3759710	80974.1	1035750	9305.41	78366.9	113883	11220.9	69423.1	8102.06	16009.7	67640	2316900	67927.2	430202	131277	75747.6	90790.7	68475.1	178258	125769	35977	24201.4	205820	97917	12012600	9974.62	9804360	471775	172988	281474	328601	109483	35734.1	89498.2	285884	78630.5	5049380
11B	Wt	14	26774.1	73183.2	82328.3	33950.9	62593	70965.2	26548.3	95897.1	314477	461791	3790050	73566.4	811769	8753.43	77439.2	89035.3	10829.9	67650	7171.26	17867.8	61457.8	1964780	88513	391697	92831.6	70179.8	63429.1	82249.7	151365	130936	34064.4	24067.7	177785	82074.7	11685900	10978.6	6141250	552096	219471	537535	431286	176514	34938.6	102274	282215	175054	6777090
11C	Wt	14	11721.7	80999	59974.4	21018.1	35379.6	76231.7	15555.3	67121.5	417770	1359710	4436260	78933.1	749362	7788.4	79424	77032.1	10184.2	46404.9	5864.09	18866.7	58456.7	2029960	87139.3	397336	101797	74667.9	66351.9	66773.8	139014	123203	26106.1	17578	168644	85431	14514700	11631	10699000	635011	261431	536327	471083	184079	41110.9	96032.6	240942	183317	8973870
12A	Wt	14	82417.4	161925	120316	60100.3	109009	135983	75424	167327	126776	1220160	3233610	319870	782810	26184	150167	301291	30615.8	184337	23582.1	36315.3	86660.9	4446140	164693	690624	441313	109555	92163.1	119803	321146	189335	75825.1	40153.4	243045	95949.1	6008340	23721.5	5436780	472835	165006	316223	296421	145618	41571.1	173322	425753	73905.3	4047270
12B	Wt	14	66321.2	111998	101614	63568.5	101518	73530.7	63717.5	73175.9	336970	116056	3214010	211325	465994	21063.6	96730.7	97117.6	23233.2	125789	15278.6	33533.2	107727	3157500	139968	659091	368646	151682	170540	54313.5	240878	197559	59728.2	37620.7	74687	50571.6	6094020	17498.5	7148190	724900	325894	1052230	604764	289385	52589.4	113156	352881	402110	12170400
12C	Wt	14	18682.1	64401.9	60887.9	26364.5	50080.1	72758.4	16370.2	79264.5	557992	296964	4956730	266828	1210050	29350.6	188870	169967	24842.9	171231	19178.9	28308.6	94504.6	3382560	137864	693975	284622	156551	161908	143423	254960	162712	51570.4	31946.4	184454	86907.6	8478310	15587.3	6708870	652703	250905	419826	481629	149903	37281	114310	391369	158697	7506630
13A	Wt	14	21840.1	93398.6	78754.5	36853.5	67337.5	79966.5	24792.4	84394.8	478815	538359	4774160	135286	1136080	11639.1	93952.2	119079	14648.8	87247.2	12190	18750	54646.2	1980140	71913.1	408813	89384.5	75283.2	76610.8	92862	131454	95651.9	19870.7	13953.8	190080	91214	14457300	10180.5	6250690	521973	208770	284922	387461	142710	34996	71247.2	301797	107256	6096520
13B	Wt	14	25891.9	133308	82237.5	40172.1	71988.8	83168.1	27598.4	105870	348891	1186410	4261820	178599	1062480	18570.9	64820.9	146276	19538.1	120984	14685.2	17138.8	62002.1	2468200	74338.5	413298	97266.4	80947.6	84605	100339	197656	69104.8	30476.9	16793.3	215933	99315.6	12747500	9609.9	5919620	504460	191658	324162	378128	148709	35432.1	77085.1	230362	117528	4065690
13C	Wt	14	44693.1	71449.5	85465.1	51960.5	57636.3	57824	41283.5	47684.7	390431	146149	3323610	192844	895485	17226.7	95494.4	175349	21311.9	117956	16807.5	19138.8	65073.5	2088830	57629.1	473898	119341	136646	128916	84989.6	141843	125788	31734.3	20120.7	115620	57951	10538400	16763.1	4421230	726519	300243	1023110	602228	315977	55288.6	81831.8	233548	444795	12407700
14A	Wt	14	14628.6	87974.4	64611.3	26128.8	45099.5	73419.3	16138.3	978722	334180	18804700	3286630	128396	975722	13796.4	89848.2	93147.6	15438.7	85743.3	11435.3	20501	36626.4	686040	62097.1	209307	56766	61338.7	63379.1	56906.8	89833.7	78061.8	21263.2	15380.1	240773	90101.4	12166700	9796.53	9701150	474024	181552	278275	347153	126010	31283.9	69533.5	160430	92960.1	3235570
14B	Wt	14	12853.6	78764.8	63214	24140	46068.2	84803.6	12082.6	72261.8	547983	207178	5225620	85693.3	1296900	14912	97495.9	99328.2	11278.7	78753.3	9478.21	24362.3	33062.4	1089850	60142.8	241162	57971.5	68733.6	77720.9	69118.8	93829.9	95898.4	19747.2	15966.6	204576	78934.9	15905200	9230.98	7195800	614769	265831	409215	456740	165297	32401.2	59010.7	147354	150501	7372040
14C	Wt	14	9838.65	88560.5	55088.1	18956.9	34761.4	80884.9	11437.9	75008.3	445911	1534770	5214110	73500.5	836073	8430.01	82750.5	104428	11557.2	74675.9	10150.4	22529.8	31346.8	1014620	52809.5	197991	58980.9	57533.2	62241.8	47122	99344.9	85727.5	20800.4	12822.1	182743	90157.7	15236900	10490.7	7040930	639737	256829	500640	492144	183918	36895.2	70741.7	159442	155455	6183590
15A	Wt	14	68677.8	162053	127167	65519.2	117697	122892	63077.9	122498	284985	301500	3272790	268004	934614	26627.9	145832	253791	28439.9	155446	22810.7	17515.8	65942	2325870	74207.7	446828	124887	71561.2	94714.5	89688.3	167786	198394	59396.7	39141.4	202793	88378.6	10783400	19999.6	5469140	493848	206668	366538	358704	152954	50496.1	69720.2	269586	73187.5	3683750
15B	Wt	14	59560.8	125546	87514.8	72183.5	111280	102598	66927.6	95859.4	327574	91250.2	2606800	284285	842767	24860.4	146401	264150	31854.8	183000	23249.9	17971.6	67124.4	2147400	71546	474298	141637	90358.2	116889	80240.7	162862	172246	53876.7	35674.8	120829	57098.8	6058510	16774.9	6767210	639022	274706	769477	528079	232484	47750.9	83500.6	275981	406576	12049300
15C	Wt	14	48428.8	122328	66851.6	52059.7	57636.9	69052.1	45995.5	86212.5	317791	87142.4	3637650	215231	490994	19949.1	120679	205810	24518.3	133263	16573.6	21452.5	65607.8	2082110	92126.9	436863	133108	122183	131179	60827.5	146546	161973	50681.1	32104.3	136765	63745.5	6154440	19518.8	5018270	630238	297024	758082	494600	213082	45150.6	54008.9	267276	318528	9490830
16A	ESCK	18	201006	180365	159138	80199.2	158558	131472	117369	231873	50035	97372.2	1332490	2979320	344673	226580	1193020	2916900	295777	1897800	196702	219078	281705	7324190	322820	960626	1783300	209733	233995	216754	465304	1775470	914763	463038	957683	72344.8	4681530	204404	3792220	322396	135593	222828	300634	74496.6	2439190	524479	1386330	158101	7983430
16B	ESCK	18	209536	219494	177543	61477.8	145204	165633	132723	228907	69280	77629.5	1299260	3309050	365725	288038	1588600	4030900	406104	2446780	218177	339393	287792	7689630	329504	924428	1878650	188109	234031	208979	419366	2102550	1007580	573608	1212280	123471	6096170	234089	3661620	303437	141444	181764	246912	82061.6	2286540	544931	1563360	137315	8721930
16C	ESCK	18	93972.6	149397	124514	60918.2	132489	118431	83910	129382	230636	76013.8	1774220	3553220	372442	284846	1562270	3522270	370099	2342390	236160	263283	251795	7091040	333539	1018440	1550570	203218	269938	305900	374166	1851090	837490	434960	1017850	89269.1	4363060	202237	3462640	356222	158041	287326	297911	110291	2074130	452002	1305170	212793	9096210
17A	ESCK	18	76235.3	128745	114280	78413.2	136512	119811	87903.3	109974	347870	72746	2425650	5054420	350678	403765	2152110	4800060	488011	3199650	345111	260482	187928	5901490	278094	1022760	1111510	218885	262985	246115	359886	2616350	1204930	826334	1524950	210799	5936420	464335	4452260	267112	98566	58186.6	232126	64111.2	716853	473365	1319870	54042.6	5579850
17B	ESCK	18	368376	237483	231090	77340.7	183912	147877	170523	385365	191542	197311	637376	11480300	867268	891699	4648170	15997500	1427980	5912300	705943	558105	336416	7846640	357106	114204	1569580	115192	105477	157180	352608	6654690	3897690	2105980	3504620	291755	3322340	1166190	3352590	180867	523651	235729	120590	43318	1725010	1080750	2863370	79063.1	5208650
17C	ESCK	18	174923	197417	167730	51514.6	124773	119164	100024	244007	144756	74879.5	1422160	7145780	491899	547948	2701350	8115020	774890	4361060	438552	601291	314974	7671530	343143	84236.5	1895230	165197	198483	180573	457136	3879190	2009710	1234900	2260660	219583	6112260	615503	4939930	287231	129739	236950	222561	55049.9	965192	758177	2004540	124104	6623730
18A	ESCK	18	290634	246564	206377	104401	214795	159387	190242	297459	112172	50913.6	63860.1	8795840	1044050	695557	3426040	10774100	1033550	5009120	477687	471970	393509	9997540	404622	940390	2590310	178371	184236	295147	419777	5082430	2753240	1482090	2862710	211547	5002480	715552	4050130	77161.7	921215	187900	80021.2	30399.3	2636710	1043410	2796400	57604.6	4448620
18B	ESCK	18	230781	167272	150598	120715	171403	127577	173115	229779	93232.8	52612	63973.4	10711700	1087020	729592	4591820	11354300	1097610	5386920	513917	564854	375854	9521410	453396	950675	2742810	160482	218619	300517	370365	4209000	2690100	1403440	2449390	192177	4270240	688967	3007260	748514	811182	444996	49478.8	150181	2388520	893956	2386420	273799	8974390
18C	ESCK	18	266820	221362	173479	60704.3	181610	246165	156423	347648	102688	146709	887378	6129250	911340	497058	2530930	7672780	730347	3879340	377531	580602	339597	9307630	405652	49116.4	2812090	175891	168441	195830	478498	4101190	2151110	1490920	2489010	243781	5154400	673351	3875030	145420	820566	212273	131929	39120.7	2220730	936983	2401690	89086.4	6892400
19A	ESCK	18	149892	167022	132927	76847.3	156698	99019.4	119354	157708	371970	172612	1295320	7195880	620917	539933	2741790	7570330	710501	4160060	426199	394497	259596	7021120	344651	954527	1511110	187418	239779	251402	386623	4412640	2394330	1080610	2232130	223954	6213990	492879	4628860	1592950	1494370	344718	149925	120070	4523110	572300	1561070	183219	6853130
19B	ESCK	18	204141	178627	147276	94443.1	172499	116261	141085	235579	59204.3	402059	802455	6825710	620019	536496	2855490	7319530	718863	3942460	390217	395169	266051	6970660	319363	963103	1621660	180956	214948	251142	362629	4387540	2168430	1066430	2220830	215653	3601560	495562	3755010	315485	126132	226969	258752	104460	4493330	581121	1689870	200761	9324630
19C	ESCK	18	279742	248526	188872	85112.8	174478	155795	153584	287541	199621	63616.8	787517	6800240	600404	548795	2537030	7558940	732395	3698310	368994	338805	284354	7292430	360705	934879	1714880	151168	178231	231282	418437	3826940	1949120	1051300	2065770	156616	5178670	583140	4201830	127422	1511840	194613	167885	43457.2	4970870	659432	1835290	83392.4	6275810
1A	t0	0	3330.54	86727.9	43015	5421.55	8993.03	68560.7	2130.72	70538.5	853061	963786	8700020	145478	1960310	15220.1	144531	155638	16242.1	118776	16267.6	35266.9	37789.1	1225940	67642.5	234669	90866.8	86272.8	77006.8	64691.9	103892	109339	23942.5	13188.5	319984	156411	15017800	17667.5	19527100	331163	131785	434184	265198	91374.2	55043	57563.9	175893	71738.1	3588060
1B	t0	0	13626.7	59416	67598.3	27151.1	42796.4	95520.7	16765.5	82012.4	386561	251509	4375080	227310	1146010	20839.5	117843	191170	22971.8	125173	17273.5	18683.8	40931.5	1353120	70277.6	255023	64541.6	63841.3	72783	70589.1	73766.5	86837.8	20532.8	10866.3	238432	100617	8551440	11942	6905210	358006	135965	111199	253088	76734.2	42352	66602.4	190376	75491	3929850
1C	t0	0	2990.21	65850.1	29570.2	908.243	1238.77	37125.5	391.041	49817.2	935475	392940	8052960	106776	1809170	17221.7	134649	79941.7	17133.7	110400	13301.3	30718.7	28701.9	890466	51705.7	178704	75007.5	108207	64784.6	56819.6	82507.5	108370	18822.1	14793.3	230318	120785	24824900	14718.3	16484300	786853	330640	424371	623745	166822	51140	49684.2	128499	96311.1	5268960
20A	ESCK	18	418190	259833	207958	84967.1	202376	94733.9	191018	443317	109890	204493	80368	5535240	667378	447421	2121270	7979810	771347	2968890	297046	328200	429211	9648840	442131	737360	2748340	88737.4	92277.1	77573.9	310988	6693380	3889320	1626430	3197560	181302	3140750	720805	2407050	269849	120201	229854	226553	68349.8	2020920	1214090	3313440	195960	9895740
20B	ESCK	18	181532	194593	162429	99485.7	156572	133428	129790	208656	124728	61324.7	1170700	6682770	574391	522517	2629890	7609220	722131	4153920	410136	506563	435123	13022000	537923	1142760	3720480	221964	250457	405779	465215	3433160	1779530	895577	1826420	142957	5576510	474459	4117640	147337	406640	183251	166383	45533.4	1149780	848953	2433950	85129.1	6105390
20C	ESCK	18	172779	153562	136423	89890.4	167729	99913.8	126441	215189	265604	93587.9	1395700	4408370	533953	417888	2220350	4583110	479183	3317470	294852	415890	387078	11095000	482925	1235170	3713670	225340	285357	192369	484201	3810420	1996470	934774	1973750	181821	4037020	441329	3307640	392681	155333	354979	349517	115101	1151520	869643	2290550	214794	8316370
2A	t0	0	4944.42	75199.4	40468.3	9428.77	21450	64922.8	4977.98	55851.4	602621	150935	5318750	153134	1207810	16284.2	118892	94939.4	15808	97492.1	12671.9	22552.3	46208	1662260	78197.5	374495	69782.2	112623	73826.6	84525.6	102918	125654	24364.4	13109.9	173835	84806.5	17494600	12940.7	11595600	567291	239098	358121	476460	150503	37319.2	64246.4	193682	149072	8202050
2B	t0	0	75594	170187	113153	63750.9	119012	141561	71190.6	127258	133422	127933	2614460	290921	763845	26158.3	140743	262462	29965.5	186057	21246	20635.2	77609.1	2461250	83495.5	430377	164997	91141.4	76781	75596	127400	181138	63047	24651.8	195448	88054.3	6712490	10592	9113180	301746	104738	96636	230390	65990.9	28504.5	98053.3	357404	78916.3	3743380
2C	t0	0	33147	81231.9	81985.1	41710.4	65453	78185.9	35701.6	95310.2	335113	306778	3886190	217182	830113	22318.7	122546	197880	21459.6	137129	17986.3	21148.4	62466.6	2083260	60928.2	408412	106006	75377.8	77426.6	80849	165294	169321	46967.7	20892.9	187004	79774.2	12302800	10111.9	6171120	447602	176041	278882	357191	123343	30279.7	102276	271335	84618.6	4507350
3A	t0	0	3319.23	68858.7	35733	5867.11	15071.8	61653.1	2898.76	54690.9	727473	264117	7297380	97840.6	1138220	11769.5	116882	71598.5	15100.9	99632.4	13054.6	31097.6	25995.8	793611	41337.2	166667	65541.7	44273.9	50994.8	40001.5	71526.2	99211.7	19255.8	6784.89	201219	104556	20342000	13093.7	14176600	651116	293085	424643	499944	159269	45700.7	86099.6	134682	138363	8309460
3B	t0	0	1917.98	58232.4	23857.5	2442.72	5422.7	44522.7	1482.97	48549	667954	648760	5783060	138090	1239970	18174.8	113442	93311.6	13928.6	102728	11830.8	27380.2	17787	628192	35620.1	129098	62646.8	70489.8	44309.3	45712.7	51508.3	86547.5	14797.6	7369.8	178769	88231.9	19339000	13577.1	12383400	783673	344443	660783	611509	207878	39168.3	42442.9	114784	233329	9309710
3C	t0	0	4359.03	64264.5	37522.4	9264.35	14826	61147.5	4171.32	60748	505172	315997	5978900	183947	1019180	18228.1	122279	185903	18391.7	98349.6	12877.2	22559.4	26731.1	834177	45071.9	166275	67706.7	86178.1	54106.7	44016.4	80896	98124.3	19049.6	10772.9	210222	102631	17571800	9997.67	12650100	554537	231861	323640	500859	147226	42277.9	63549.1	103473	118683	6207690
4A	t0	0	3552.85	59768	38811.4	9092.59	16504.9	59301.3	5260.41	58963.3	446096	892173	5202380	92403.9	891546	7041.61	87641.6	74816.3	10540.5	56874.8	8070.37	19786.4	34219.5	1060850	56797.7	209714	59750.2	96335.9	60267.1	45675.6	79503.6	85128.8	14423.5	5638.3	169143	83163.8	15645700	9318.01	6927930	673552	264584	607145	491129	197967	31290.5	68579.7	176304	209427	7825870
4B	t0	0	9796.68	72089.3	53224.7	17008.1	36291	65188.3	13418.3	61563.7	395419	137988	4507490	103915	564710	9675.19	71901.6	89046.7	9820.19	70045.2	9172.67	17717.3	34647.8	1142670	53463.4	256126	57263.4	89228.5	75305.5	49879	103921	88636.3	15313.1	9271.62	142458	66159.1	12359600	8938.58	9172710	834620	342797	1339610	619424	402126	49535.1	67906.3	188870	390492	10605100
4C	t0	0	7366.36	76393.9	47262.8	11115.5	23434.6	72421.5	7072.89	63673.9	421658	176866	5346120	64963.3	1270430	10620.8	94592	68427.3	13458.2	70167.2	9494.38	20027.7	33806.5	1075480	57765.2	217449	63297.6	76438.2	59886.4	68336.1	97614.3	92757.3	18263.8	7664.04	210098	85558	14379400	10468.8	11277000	705527	278688	652464	499313	219465	32830.5	62922	168615	207759	9439250
5A	t0	0	5898.89	93930.4	49256.6	12123.2	19162.5	75744.3	6971.46	76488.1	425233	252221	6472030	169561	1177910	15868.3	117767	139402	17700.6	106175	13507.5	23265.7	47440	1593990	78491.2	287513	81785.9	67724.4	78087.6	64901.6	94890.6	112646	22623.5	8380.65	291586	115731	17260100	14011.5	13891100	349162	127579	363165	191147	94299.4	48852	87550.5	214254	70939.9	3403010
5B	t0	0	12154.1	116176	74382	22239.5	37897.3	108153	12838.6	91240.5	546490	346527	6742100	190800	1245710	16288.2	128753	126686	18937.7	74844.5	13518.9	25155.5	55270.8	1857010	83962.4	359183	90517.2	84243.5	102160	76830.4	89624.6	120948	23340.1	11127.1	296558	149944	19644600	13925.6	15525200	421609	162346	407927	263266	99484.5	45130.6	96841.5	229412	91514.5	5124020
5C	t0	0	4561	89357.5	45411.4	11138.8	15466.1	70842.8	5070.75	78796.8	536820	359592	6414080	116242	1298090	17952	120602	86885.7	14394.7	95534.9	11461.4	28531	49885.8	1548460	76062.5	287952	82433.7	86458.9	80278.8	59681.5	131157	114030	22538.5	10871.7	290738	130628	6441580	13735.7	15219300	450655	169246	97932.8	297648	113614	54836.7	80122.3	210373	84532	5409260
6A	MCK	10	116209	202889	153436	70145.1	112767	118018	66000.5	175942	145151	1429730	2115990	146458	82245	16045	66831.1	192202	19896.1	75083.5	12380.7	43464.2	167970	4829260	222576	883178	652059	158607	189261	206387	381464	433256	159545	69894.8	177046	73150.4	5420300	25303.9	4899170	507974	202536	393201	227517	89077.4	52888.2	186157	468721	158436	5981260
6B	MCK	10	80936.1	170325	125096	64285.2	87322.2	129379	80622.2	159310	133135	463646	2880550	125929	693825	13094.6	83558.2	112079	15716.8	86413.8	11417.6	36990.7	140813	4809900	228334	813004	650517	161551	170832	85981.6	416995	417642	107962	55623.9	140653	90954.2	5676760	17366.2	5025770	492262	172367	343194	322296	134876	33300.6	139457	436747	122818	4989430
6C	MCK	10	57013.9	113437	87246.2	60363.4	90833.4	79240.3	58531.1	87773	329956	222910	3251660	85945.2	629822	9636.23	71482.2	131426	14825.3	53598.9	6784.72	27793.3	90196.1	3584540	152265	677097	410254	153801	198797	86803.2	296379	289347	64710.1	42957.5	114309	69992.6	6382930	17584.2	5620180	608937	272875	654353	513372	187326	71952.1	114135	345045	298058	10090700
7A	MCK	10	78740.5	142024	115604	61282.6	119457	81222.8	67302.2	125699	289371	541884	2828980	87256.8	664617	8036.51	67953.7	78241.6	10908.8	60071.3	8249.48	14634.6	54179.5	1760190	84827.4	338782	75912.1	121652	36838.1	67781.8	126997	194430	55367.6	27447.6	144770	70819.1	4973270	11185.4	7692950	769610	335385	1220990	575696	340168	42323.3	68889.1	188147	426006	13083400
7B	MCK	10	70259	137222	100999	64291.3	121015	122225	69587.9	97501	372370	1186000	3276080	51290.4	993216	9795.28	82219.7	97891.2	10948.3	59938	8091.51	20462.9	52487.7	1759800	82445.1	387917	87443	96088.9	70169.1	89729.1	125878	183230	51652	20704.5	166619	64115.8	7191880	10822.9	5849800	610112	241319	522509	556166	178380	31149.1	60832.6	166926	216616	8542600
7C	MCK	10	80929	142796	117454	50992.7	117886	103882	73688.2	103509	315360	102059	2744490	80545.6	872307	8527.82	68928.9	83950.4	9744.35	52296.3	7150.51	15309.6	51585.2	1556950	71428.3	343841	51017	75358.8	67841.3	84262.9	110070	153347	42963.6	20322.1	128294	62725.1	9953380	9183.19	4791710	551587	237790	452683	431853	147073	37862.1	53643	136865	275512	9300110
8A	MCK	10	144244	169440	131033	93247.8	152339	116914	123640	170105	113738	111505	1860310	391091	706089	36332.9	200225	385287	40384.2	252413	30420	22300.4	77668.3	2367750	100229	514765	217300	153950	147204	126614	191676	349148	140586	65824.2	157696	53070.1	7768470	26027.8	3937190	744572	312138	1322430	573566	354371	44386.8	101926	314495	531675	14668000
8B	MCK	10	81381.8	180207	124934	70530.3	106863	117534	84428.7	155900	107195	140486	2936620	315404	730072	29536.2	155261	348083	33109.5	201979	25662	18884.8	72040.6	2465240	90708.2	456043	173153	107476	117073	60641.6	197345	317674	96345.7	55057.6	138537	88745.7	10581300	24423.7	5628470	417535	136154	204030	290582	104298	47535.7	83233.8	289412	67749.7	5016060
8C	MCK	10	90261.7	153862	136199	70649.6	135005	121950	91048.3	158017	240783	190807	2931330	388653	760965	31822.7	189014	368145	40030.2	272414	26311.2	31826.3	75964.1	2859690	127674	491691	254584	100653	112005	97471.2	233415	336893	97162.4	61297.3	146282	80253.5	6086110	27874.2	5460890	466157	174775	322341	329549	131806	47531.8	121001	369628	122035	6288670
9A	MCK	10	76565.5	118075	104508	71007.6	129842	115624	79890.7	58295.4	387250	507786	3039350	94086.9	608403	10696.7	79792.9	91170.1	12898.3	66604.1	8351.03	18400.5	67718.6	2122990	90044	463204	149045	99060.2	101238	81728.8	172348	223453	70952	34987.6	101012	69842.3	7213320	13548.5	5773380	504101	217545	383560	382594	133574	37646.3	50641.6	242818	193073	8189430
9B	MCK	10	87813.8	171583	124912	76306.2	137872	141496	83274.7	147532	314302	405620	3442160	94668.9	791561	12510	85002.5	119813	15323	85330.4	9334.81	15616.5	60389.9	2158670	69117	388327	124594	89627	114099	82906.5	148186	264620	80829	34337.2	100555	103941	7588400	15190.7	6467940	344852	82942.2	81013.7	212845	80400.2	42416.2	87489.5	229558	63176.8	3421040
9C	MCK	10	37311.2	88462.5	105694	43262	75667.7	76932.2	37370.2	122208	404528	230162	5443120	150093	1028860	15381.2	115599	133969	16217.4	101197	11884.5	20425.5	72351.6	2405650	74915.4	475485	82059.1	92294.9	103052	96752.8	165644	268734	90841.5	36914.3	65449.7	107357	15474100	16376.1	7873140	503035	192224	403700	390043	142727	44288.2	90821.4	227950	66727.3	5332150
[truncated: 72 more columns]

## Sheet: RPLC
Sample	Group	TimeWeeks	M349T60	M348T60	M136T61	M170T62	M232T63	M359T63	M542T63	M333T63	M664T63	M87T63	M123T63	M86T63	M428T63	M524T63	M159T64	M138T64	M132T64	M130T65	M119T66	M129T66	M136T66	M182T66	M165T66	M139T67	M215T67	M203T68	M307T68	M101T69	M231T69	M157T69	M267T70	M245T70	M113T70	M153T73	M347T75	M560T77	M364T78	M175T85	M137T85	M173T91	M232T91	M171T93	M559T95	M269T95	M291T96	M137T96	M292T96
10A	MCK	10	257494	2198080	523385	43809.5	28599.8	26285	22837.5	45867.8	116386	87784.2	1557020	1450290	121229	38761.1	532445	115192	515121	1178480	34449.1	106583	496705	327108	535706	75392.9	256425	35925.4	1830.45	140682	57699.4	203042	346417	51755.2	392747	465547	82602.9	575474	404313	26938.2	362249	319585	107428	533786	254729	310100	894094	7444190	86386
10B	MCK	10	135826	1132960	210063	26503.8	11497.3	11617.8	7990.09	16755.8	45465.1	147967	1241010	2411000	36201.3	13369.9	970292	305089	833438	457705	70518.5	58865.2	933757	598904	1016390	37014.1	176480	415822	1969.88	119174	39412.9	31722.4	372093	97403.8	592958	855333	86369.9	158444	177803	24469.6	401931	303573	44043.4	564004	300097	359813	961739	8661330	97633.1
10C	MCK	10	495750	4222530	1419150	41329.8	97279.3	103998	92268.2	143684	471164	43595.3	2370310	837418	425622	137584	429377	54840.3	293665	601241	50969.4	75179.4	165869	192771	311622	45830.5	128824	634322	33506.4	154697	60907.6	227673	257151	34186.6	263754	267983	79097.7	250462	291512	25342	389205	930554	226779	589497	61779.4	62088.1	515817	3118000	49947.4
11A	Wt	14	613798	5829650	1758460	82925.1	141707	182543	145081	234774	748655	43095.9	3795770	998633	689408	205369	619336	95632.8	309055	661749	59154.4	71077.3	772265	203484	323764	42813.3	40336.3	26810	1075400	124384	34249.4	236345	299531	37328.2	287042	306881	83381.6	121277	369932	28595.2	789770	206371	183186	701339	31846.7	42650.9	498037	2758870	54522.7
11B	Wt	14	487777	4031390	1409060	93050.5	98909.6	107203	69717	157484	466760	64700.5	2720280	1270050	385201	116427	736348	111153	410166	267756	54428.2	66784.4	315002	279539	511430	32755.1	54862.3	1176410	1950.89	113152	20228.6	145576	233263	35248.5	284034	373047	78750.8	377838	311933	21392	689996	162491	45477.5	597547	111013	92109.7	706634	4071580	62404
11C	Wt	14	238868	1951770	539795	78478.7	24936.6	36393.2	20183.5	42881.1	100708	99413.6	1850260	1698260	101909	36291.6	889496	150929	499912	231138	72135.1	113826	556771	309930	602748	41707.9	53141.9	21791.9	1430.03	164296	17653.3	53737.2	212513	30101.8	301931	493199	42032.4	435640	198954	27805.2	517724	356658	19706.7	685113	138778	141848	798625	5411190	66402.3
12A	Wt	14	723225	5933330	1813510	85303	146110	149685	141349	251357	802282	56401.4	3631790	988458	721859	220208	673024	89740.5	309931	760035	61421.2	78228.4	171228	277723	430869	38339.5	101060	35303	1148560	108135	55720.1	198280	247946	32881.4	259268	318209	82058.4	121510	477789	35881.5	57613.9	412231	151838	687786	5881.91	53798.9	515475	2811270	52584.2
12B	Wt	14	251322	2103400	453426	101678	18252.9	24695.7	14686	35297.4	83241	139246	1589640	2384780	48534.3	26172.4	918533	242318	770268	309546	89859.2	79471.1	879760	543495	930174	36717.7	103646	513953	2904.53	116241	29298.4	38336.8	138745	47416.8	417882	757123	81787.6	409088	271509	27977.3	752917	677966	13826	563956	235167	293085	782099	7646830	79529.6
12C	Wt	14	452030	3997640	1274660	83708.7	63912.4	90291.5	59781.8	135921	403343	85482.1	2450190	1372150	327622	107566	680083	138275	446407	282168	49915.8	60830.8	491154	592605	563585	28444.2	72101.1	478053	6190.4	109157	38943.6	114278	200506	33547.9	252305	435607	85275.4	368706	387224	32890.7	812447	872225	29985.4	582333	122491	136729	683045	4850330	53686.5
13A	Wt	14	639278	5613050	1644020	67375.5	83434.9	115260	66245.9	145650	465605	56704.2	2962050	1135860	383875	117377	645726	100130	339406	124732	52486.8	59840.8	851174	245386	441453	29956.7	12510.9	17591.4	1980.52	108426	49565.1	98336	197750	27044.6	237802	329378	99940.4	324459	425540	22744.4	823181	2997690	50060.6	606602	95051.8	94794.3	557999	4006000	48022.6
13B	Wt	14	676041	6123060	1899720	58729.1	148860	187241	129739	230454	870733	33311.7	3800820	891254	683056	218365	582260	84394.5	296242	676599	51331	65323	930734	241144	438384	34890	25649.2	369871	938012	137911	52547.5	159633	219814	29540.7	248174	290207	67102	143633	438673	24586.3	955626	1365600	153259	646382	7537.27	31345.4	500383	2800920	53488
13C	Wt	14	254009	2310540	492069	69043.6	23107.9	26457.2	19421	37294.3	107645	128481	1717530	2286060	92397.1	30521.7	839207	215105	761675	270595	72640.7	63306.6	789093	516823	858146	30875.9	63238.3	695966	1981.29	123794	33046.5	41476.8	237048	38746.8	379921	704218	74990.2	529289	313154	22359.5	798122	856816	14288.5	548338	303715	334179	807896	8091950	100496
14A	Wt	14	720036	6288400	2297040	103899	169706	253751	164517	289289	1036690	55410	4476390	884319	851453	277174	660534	99294.4	264246	643715	79944.1	87332.6	1021870	216290	331319	48089.4	19456.5	34732.1	1258420	120063	56764.2	221286	245608	29106.2	265777	321420	43942.5	95978.7	315682	33549.9	969455	170608	207200	775119	32457.9	44839.5	497800	2583720	58621.1
14B	Wt	14	448874	3786700	1178210	89889.2	55877.8	80465.6	44603.9	63745.8	227781	73185.2	2399800	1394900	227190	52486.7	806226	104299	394880	209569	77510.4	85042.3	401443	275164	441907	49453	15101.4	132331	1858.86	176794	32729.9	42436.2	158976	23239.9	221983	408291	38366.4	323762	264611	31277.3	601634	412849	7338.08	791811	96519.5	105833	755906	4443130	72850.8
14C	Wt	14	393630	3386740	1211560	93921.8	34367.3	79647.8	46621.2	87513.8	267928	84815.5	2288680	1425660	243731	55271.8	917863	143970	420120	223693	65344.4	84683.2	462541	281868	563610	45688.6	21651.1	27677.2	1766.99	141698	34334.6	53401.2	184486	20090.3	244085	438006	59108.8	341193	277242	23881.9	633179	194299	11860.1	706664	100168	125779	752391	4608450	63076.3
15A	Wt	14	589953	4911400	1755130	98252.6	137595	232487	140967	239528	690472	42094.6	3868610	723456	730588	208115	688290	76341.3	196208	964511	368142	71641.2	930713	198405	339260	58044.3	67255.1	33440.8	1952560	167036	41880.2	280769	261092	31745.9	211008	379583	62024	94905.2	215182	42518.1	666644	304255	301334	788005	4419.1	37149.7	498863	2342650	57826.3
15B	Wt	14	216144	1596440	389818	120562	19230.4	23625.8	17376	39653.7	85539.9	118214	1740840	1984770	72582.7	26833.9	772599	184100	642596	816328	56688.3	89325.7	758027	432665	724340	46402.2	143535	863815	1592.66	96587.7	25867.6	156957	249578	56036.6	376662	692172	81169.7	425611	289722	23396.4	597831	204303	21185.1	538354	270785	332229	910522	8129640	91007.3
15C	Wt	14	164526	1713330	460215	134092	26842	41237.2	18656.1	27267.8	61792.8	129319	3141870	1946010	96582.4	31826.2	1380970	165458	509206	253184	192291	259245	668578	338949	739404	142934	55672.7	38552.6	3524.27	533329	32070	173183	200964	30189.4	296748	672100	66219	297445	119046	117762	250006	128568	11516.1	1024670	1145.82	127301	1704520	6987810	134258
16A	ESCK	18	172844	1444700	337807	24910.8	29054.8	13016	16725.9	42886.9	86932.9	166725	728576	2793380	80585.1	25726.8	235282	112716	1093130	450337	76967.2	348736	729401	673450	875412	249763	962953	29676.5	342734	165347	169085	199788	248896	78609.6	383719	494138	53893.6	488047	307989	63243	383972	1302560	250423	444824	256719	397036	794152	7983860	75048.6
16B	ESCK	18	157563	1320430	291793	36986.2	30192.9	17131	21207.1	62477.1	135223	172412	829667	2830000	123841	34907.8	229397	109315	1125810	255542	67395	403174	750887	681428	752818	285938	1172070	29917	203084	185278	181970	209851	263340	85650.5	363441	499581	65593	501727	285692	66785.2	428621	1886750	246127	434530	269187	447542	677912	8639070	67131
16C	ESCK	18	47086.6	444013	81649.3	40138.1	17977.4	6168.87	5491.42	10369.6	28571.8	260435	409367	4348840	26277.9	7795.1	256361	108056	1538570	1093200	108408	210110	1118220	837662	1170320	141863	546690	22829.8	12229.9	86602.5	208628	102835	307809	103630	476966	386178	32358	332506	151992	67474.1	121955	227303	200708	391190	249870	532439	616940	8657410	61711
17A	ESCK	18	44065.4	469686	695596	40439.8	19981.6	6050.8	6485.61	12050	31030.7	272154	352561	4255690	25691.9	7918.12	270192	124125	1523830	968915	110848	207708	1149620	908977	1148050	136695	570710	21398.9	10986.6	87790.4	212686	107614	313719	98902.1	479624	397387	26523.7	367260	159228	59621	141804	252242	201211	408951	244378	524926	679209	8689640	77872.6
17B	ESCK	18	506998	3914820	870267	27685.5	48499.4	27265.5	36516	89830.6	286645	205381	1067340	3198170	163156	42624.4	123416	41089.3	1242410	139979	89081.3	261156	860572	721993	968096	177914	726965	36297.1	1671260	104348	241104	110071	159500	28473.7	208267	215583	113845	457778	404958	103440	354405	218881	266615	406906	67446	203813	480529	3843500	38965.7
17C	ESCK	18	228583	1883640	386448	41107.3	30953.1	10938.9	18797.7	37436.5	98210.4	242361	644815	4018200	74691.7	22026.2	231288	116499	1548240	250703	100747	291070	1070330	918845	1151950	198980	756977	39263.1	122868	100688	226940	114322	206843	57652.8	311776	339645	77159	553198	350420	39141.5	359861	117933	238528	405546	143978	440831	581796	7066160	60675.7
18A	ESCK	18	343271	2660040	584577	16272.3	31862.6	11958.2	21510	55555.8	111510	186862	677569	3248320	92626	30101.9	76120.4	31702.8	1252020	773031	62476.6	444654	659978	635089	700259	325299	1428910	23790.5	1850120	62917.2	247219	168606	105748	39180.8	172870	125794	113158	471397	339593	22114.8	219650	139689	274390	366375	41.0948	291803	318771	3814360	33961.4
18B	ESCK	18	56684.4	414901	73235.7	25689	18425.9	5108.84	6793.36	14744.2	30214.9	328507	242018	5657420	27048.6	7680.33	213285	220041	2423210	236546	145645	630451	1477540	1344490	1475640	459084	1620030	23635	12632	72384.8	186763	56501	331835	155170	682135	761468	29698.5	248861	99026.5	16500.1	154308	41257.1	207474	289046	49116.3	794533	353375	8512760	40631.4
18C	ESCK	18	69686.6	585225	120274	19607.4	23263.3	7845.58	11977.1	24684.2	43536.5	196987	425471	3261030	52226.6	14530.7	99024.7	43395.9	1272330	172214	70898.8	414748	716720	679926	693681	273007	1078390	319747	63824.2	50001.8	199387	59592.3	167617	64174.8	326296	196548	35927.1	376348	146599	40287.7	142863	86451.2	259637	363995	91355.2	454728	433774	6961060	33913.6
19A	ESCK	18	249432	1866940	434879	42480.5	33384.3	15083.8	23248.9	45932	142366	153402	874983	2449980	105673	34899.3	359670	177556	1166320	623462	70487.5	380956	788400	759837	908873	264838	1129630	197426	7561.21	216567	206774	219678	296714	99775.1	502071	574373	119121	400090	425026	85142.6	849358	51536.7	117178	463751	210003	335932	715258	7195120	69611.4
19B	ESCK	18	87795.1	807976	405182	31284.3	26130.3	13427.3	18254.5	46453.7	111013	169228	793594	2811770	69942.3	27709.9	230896	126544	1150640	571612	62341.5	381530	719645	649304	733927	269802	1103280	27129.8	26302.1	188866	179846	196354	360414	159862	590093	534550	45042.5	448875	209169	65926.7	290767	62439.5	235370	432748	322136	591062	851358	9639660	88659.8
19C	ESCK	18	305434	2502850	876205	27787.2	88278.5	28077.6	77865.3	197365	497969	93747.3	1690950	1606990	380880	106945	110168	35917	584786	478056	52027.1	346168	401185	360972	429627	219456	1066140	142041	759882	173612	183211	165618	230917	60030.5	294409	285132	78015.3	166634	287585	101776	421439	80160.8	298132	448808	170509	220321	706147	5882820	58628.6
1A	t0	0	520041	4527410	1264860	39860	77855.7	102520	60367.1	124651	364117	27909.5	2489790	847034	369334	105658	332019	47331.9	237558	330588	51513.9	73956.3	117434	165624	286266	34020.9	31212.6	99887	233820	66795.3	27671.5	119700	135754	17442.2	145405	149497	78793.5	202500	282969	23723.2	548971	1719220	62250.2	549878	21168.8	37640.1	333404	1916810	37818
1B	t0	0	536444	4394990	1358100	47669.5	77750.3	131660	74983.4	156794	426129	50720.7	2558530	860601	465207	137562	311600	44225.5	233157	396496	53043.1	64253.4	721367	172236	292873	29586.7	21031.1	19893	283417	112842	29432.4	123427	131079	16784.7	166060	144517	84251.9	156397	301771	24133.4	608088	1242880	80575	572168	2201.77	29023.2	317145	1797840	34154.6
1C	t0	0	219159	1839440	515241	45181.2	31938.9	33400.8	26736.1	43886	160226	87387.9	2149860	1403720	154302	46031.5	878506	141338	412179	368904	27724.1	101685	484235	283076	493808	31964.5	30333.4	32213.6	3842.08	115962	24024.6	28044.2	171315	20814.6	232768	353150	67067.7	290687	254247	22483	722916	1390100	20590.4	575550	88072.1	102248	604408	3902200	64053.8
20A	ESCK	18	47804.2	325243	696146	30200.1	18157.6	4463.47	5274.5	10816.6	25218.7	259579	282489	4422300	22908.8	6969.18	154008	112222	2055270	191530	155063	520831	1764050	1491750	1623390	372952	1666060	267475	31650.2	146942	189744	125837	252283	98591.5	453569	338036	24646.4	315258	131152	33667.9	100841	121329	383856	259071	102767	689250	452626	8369510	43361.2
20B	ESCK	18	220415	1746840	346275	20758.7	32027.7	8806.73	14028.2	39902.3	82533.3	201285	484576	3344520	55407.9	21972.7	85815	48039.5	1357790	263215	131214	521184	1239830	1335850	1413320	372554	1740220	46024	360764	138549	261333	137053	150209	39369.3	245405	164794	96868.7	541055	261554	27460.4	143311	213129	431881	351044	75936.7	479887	494628	6797800	44554.2
20C	ESCK	18	34998.3	229724	519040	37002.8	14350.5	5475.17	3687.34	5251.09	12081.4	310654	301012	4983250	14552.3	4087.55	201088	190417	2076000	183406	189605	584653	1808470	1722940	1871300	434165	1722980	27287.5	11593.1	148770	221730	128805	323374	152500	595358	586467	30149.9	257524	61840.8	18645.9	116608	94334.2	288640	337042	86844.8	771471	388412	9057560	45460.9
2A	t0	0	256610	2100030	655033	46256.4	36970.7	68358.4	27499.8	54236.2	103495	104881	3353370	1602370	151244	46815.6	1266830	137738	469147	224677	252530	252880	563621	222447	588334	153295	26166.3	29836.3	2292.99	583071	38526.9	106973	229528	26156.7	317129	425543	77463.8	287463	145031	131372	241545	232934	10200	1175570	579.804	117327	1658060	8341380	107875
2B	t0	0	557836	4869960	1490350	33147.1	119537	109807	104724	208982	601419	45360.1	3043050	741251	551144	159399	280679	48917.8	240374	421119	48237.1	76766.6	680090	180797	323773	35620.1	113101	21052.3	617040	87035	38084.5	135976	173773	23982.7	193482	153689	111887	124699	371924	20338	764389	1230410	196024	544042	19.7829	33205.5	338655	1914250	37321.5
2C	t0	0	415076	3559760	1224180	39366.8	77305	101659	73844.6	143831	407620	48303.9	2715060	1014140	378484	113868	569749	72640.2	307629	312197	52698.1	71691.7	302922	202874	397877	27597.4	35063	17879	39583.2	111663	30404.2	65204.9	163534	21828.9	209325	227945	100479	281681	402923	20363	980225	435703	78319.1	603024	50890.8	50416.1	505760	3132770	51553.4
3A	t0	0	241309	2070310	796949	45583.6	58953.3	57908.2	44762.4	86467.6	211763	65998.5	2231690	1282710	225965	60365.3	901131	140916	370218	254258	71481.3	101290	427985	237785	483967	47031	41772.8	21886.4	1709.36	155029	18011.9	42687.2	229313	28605.9	293675	351919	59230.1	394993	274915	26017.7	694868	2133630	21722.4	765142	91101.8	141617	811877	5229130	62155
3B	t0	0	136757	1083070	312540	44988.7	32797.4	49229.9	28321.6	46089.7	142596	104582	2268940	1735130	134153	49430.9	1239240	213761	512092	323977	42718.7	111359	629540	326645	632425	39099.2	35773.5	25184.3	1085.94	147556	14742.2	26094.1	288918	42494	393181	535120	30325.4	344838	195055	27926.9	857963	1979040	10125.2	695862	173417	168932	726750	6462890	89844.1
3C	t0	0	270192	2182410	903204	36162.8	37811.1	66134.2	38602.5	92786.4	257688	56833.8	2104980	1042470	252483	77257.1	658747	101205	280671	208068	58897.9	82880.1	300664	181111	376641	37710.7	35878.7	183722	1154.25	139230	13893.2	34237.3	157030	23199.3	231967	253166	68862.4	281400	274523	21254.7	821883	1956240	21989.8	587173	72156.6	76774	495726	3717390	34221.2
4A	t0	0	264640	2572980	643601	53363.3	42226.4	56161.4	32599.6	66134.1	183306	77198.9	2120300	1627330	174127	52649.7	935208	156489	447376	262469	64251.4	111091	506873	291959	530673	37443.3	35781.2	20698.1	1743.9	150385	20445.6	44868.1	232752	38543.6	335228	456857	51178.7	461326	300177	27018.8	675101	99671	22415	663322	174971	169826	774255	6142710	85289.9
4B	t0	0	144097	1178520	286065	47466.3	22929.5	33380.6	19812.6	47819.4	113383	124948	2327350	2133310	101308	35226.4	1245730	279286	686052	444474	72389.1	108560	692273	438671	763699	34644	53758.4	29497.5	1404.39	130947	23191.8	24798.9	331789	55073.8	485777	667253	38935.5	422466	215017	28048.3	858698	1012350	13869.8	620249	230801	248672	786180	6833480	82474.4
4C	t0	0	316606	2660150	981638	44294.3	52496.6	70745.1	40047.3	118035	346542	88542.6	2753160	1455570	293864	75890.5	919233	167968	463881	353616	60527.1	83133.1	413929	302481	495709	36865.2	30613.7	25836.3	1932.41	122202	23231.1	41477.5	244037	33232.6	369681	397815	82491.9	423272	341478	21975.4	834517	881979	17738.2	626078	143207	136796	668678	5263390	69282.4
5A	t0	0	649304	5648780	1863810	40028.7	125969	201871	115953	206212	620803	57522.3	3539170	937106	655917	176658	404317	59678.3	241774	925130	77352.9	96171.7	924004	127912	304133	48543.8	15773.5	27514.2	1021700	153799	25655.6	143813	199909	25516.6	225496	215837	126065	191288	429191	30455.8	910917	513860	131501	797625	754.514	48115.7	434436	2508170	50179.9
5B	t0	0	593015	5271060	1722510	41131.2	125421	150361	101663	180534	498308	54497.3	5611730	901433	591115	160795	436854	48570.4	245771	281693	84705.6	107941	949071	118893	305101	48828.7	18947.9	80834.1	328896	61687.6	23762.1	122984	192051	20254.2	225709	191252	110205	141372	346106	32357.8	713346	1599420	125180	798890	37886.7	47485	480665	2668940	55061.6
5C	t0	0	620056	4915710	1556550	36591.6	77917.8	127468	39598.2	122973	388559	59228.5	2907900	991204	412239	120359	537270	67797.8	283315	1215720	229160	107478	833276	139125	302128	49989.8	24409.7	75760.2	84793.3	165539	21476.3	89188.5	162936	22626.6	199733	223227	100425	221773	349311	30545.7	740499	852335	49434.4	791454	17037.8	50987.1	526520	3004220	55426.2
6A	MCK	10	581897	5131730	1470840	64532.2	106177	113037	83769.8	196106	541977	53677.9	2814690	1044230	459426	140570	621092	90723.5	325913	634396	57728.2	92349.5	372424	327043	509246	28189.7	202095	80250	4552.17	145259	111580	240156	280411	38330.2	261816	310429	70428.4	273798	413580	46326.4	525532	267068	125507	610881	85681.3	95044.4	594340	3726330	60259
6B	MCK	10	718074	6251130	1888950	73773.4	159148	128046	141305	280821	928329	47210.8	3682410	1009370	704341	236475	500232	85887.3	345202	425737	54557.8	91038	944463	315925	482541	51734.4	275895	121164	609935	215610	132837	279445	313246	39413.2	314544	313655	89816.1	150079	428235	56632.5	805182	483528	254429	564687	58896.6	82845.3	543905	3256790	59252.5
6C	MCK	10	238824	2097500	465560	78519.5	27559.9	28097.8	22100.8	45900.2	122183	129053	1579420	2176300	104833	36506.9	875620	180667	701100	235815	64371.4	80295.6	833646	512552	831159	41221.6	218804	172982	1906.98	77285.8	74419.3	127919	297632	42034.9	435844	581850	76028.4	538369	324822	42118.1	504415	181244	45650.5	554030	265213	331321	892252	8350180	106644
7A	MCK	10	237148	2002080	461796	104925	46251.1	33396.5	24663.6	33121.6	157363	134795	1467950	2310110	121065	36926.5	1035380	253114	765598	528579	93588	40656.3	1002800	608758	1010050	37425.3	117306	233260	2597.01	136991	40950.3	31428.6	272192	41255.8	395101	688592	110573	403708	336734	22975.5	777999	163824	37536.4	573115	242734	250153	867395	7276470	94199.9
7B	MCK	10	399297	3505770	1020320	78138.5	41160.3	51353.5	32501.4	97723.8	294113	102870	2100370	1552420	250365	84482.6	710984	131293	499354	264214	51544.8	74276.3	642817	396577	651382	41070.3	127169	213005	1890.56	84129.2	50182.2	136785	245163	36223.1	317379	422127	91797.5	484979	338778	23032.2	251575	1374710	46178.2	587617	158847	170715	721827	5569210	65549.1
7C	MCK	10	313701	2712260	568145	73770.7	37072.3	47727.9	32183.5	64959.4	215233	96788.8	1925600	1723960	189268	52985.2	715663	114512	550082	1225340	59690.1	81755.9	606328	417426	700377	34436.9	103600	1712160	1842.16	125148	42234.4	216181	262932	48773.4	354331	457277	62129.3	464907	371579	25313.8	501064	194713	40101.7	580268	276028	288737	864172	7977620	105121
8A	MCK	10	245612	1970140	419175	68430	28748.1	30913.1	23789.4	55642.9	161951	163962	1718530	2840270	123464	42583.2	987623	261773	953473	540383	70144.9	84383.2	876141	641978	914352	34868.7	206047	727573	2138.05	104129	36539.9	42321.5	348808	82398.4	528310	721526	118247	566364	405389	27365.9	1048850	109394	38670.2	521417	292537	365898	976177	9179390	103943
8B	MCK	10	514561	4545590	1308980	42423.5	67800.3	110713	62188.2	118692	355677	50083.1	2463140	877800	362924	107613	338582	48135.9	240953	321378	53695.5	79673.1	142496	163618	293440	32926.3	29211.5	105690	233666	73684	28217.2	125244	132241	14978.9	148962	142263	69554.2	193757	273985	22119.6	542513	1748450	53101.3	553905	9607.37	35281.7	374640	1960340	37272.3
8C	MCK	10	716536	6219040	1775750	75480.5	154583	144678	130234	246375	812483	47053	3400190	1101590	680740	197583	544003	96427.7	355988	406029	53131.5	88507.7	945437	259491	383247	56070.4	204419	126446	16997.3	158694	95640.7	243790	355341	45345	382411	310482	121390	307580	528074	34227.6	781094	259754	206706	561466	91490.2	96365.4	592411	4019680	57721.2
9A	MCK	10	273478	2512400	658414	55582.3	38174.7	40251.3	31135.1	41336.3	145898	80247	1602560	1417920	165658	45424.8	683506	115946	441501	1389900	54249	69330.4	488695	300181	507498	37445.4	198739	108783	1672.35	118536	44638	194951	326845	43296.4	344342	417145	89300.9	528147	365989	23914.3	479681	394631	48030.4	567910	214939	267757	894090	7013170	97621.2
9B	MCK	10	593292	5319820	1699490	39174.4	135600	159180	131640	232437	707637	34298.4	3418970	556654	652734	193797	355138	39292.9	167623	714150	57713.9	80766.1	862771	158767	238868	47605.1	150928	31142	1106920	155558	76046.6	229020	282612	36609.6	266894	212069	89178.9	119370	353248	23351.4	593622	186399	209945	644898	8510.8	34162.9	363637	1840600	43763.6
9C	MCK	10	416937	3473760	1155740	43315	68857	73156.2	62680.3	148041	394831	45404.1	2326180	850856	384802	104630	577958	84937	281577	396291	55602.6	44478.1	268135	228407	375266	44862.6	155055	22401.7	6495.81	72828.9	51169.8	133371	239276	30130.8	249978	281604	121051	356861	368431	21371.7	679812	1150380	66106.6	547660	79594.1	89174.6	514050	4012690	53749.1
[truncated: 78 more columns]
